# Supplementary material
Source: PubMed Central journal article supplement (PMC7042947)
Supplement: jamapediatr-174-e195897-s001.pdf [file jamapediatr-174-e195897-s001.pdf]

## Supplementary Online Content

Foglia EE, te Pas AB, Kirpalani H, et al. Sustained inflation vs standard resuscitation for preterm infants: a systematic review and meta-analysis.

*JAMA Pediatr.* Published online February 3, 2020.

doi:10.1001/jamapediatrics.2019.5897

**eFigure 1.** Flow Diagram

**eFigure 2.** Fixed Effects Meta-Analysis of Relative Risk for Death During Hospitalization

**eFigure 3.** Fixed Effects Meta-Analysis of Death During Hospitalization by Post Hoc Gestational Age Subgroups

**eFigure 4.** Fixed Effects Meta-Analysis for Death in the First 2 Days by Gestational Age Subgroups

**eFigure 5.** Fixed Effects Cumulative Meta-Analysis for Death in the First 2 Days

**eFigure 6.** Fixed Effects Meta-Analysis for Death in the Delivery Room by Gestational Age Subgroups

**eFigure 7.** Subgroup Analysis of All Secondary Outcomes Based on Study Design Subgroups

**eTable 1.** Assessment of Risk of Bias for Included Trials

**eTable 2.** GRADE Quality of Evidence Assessment for Primary and Prespecified Secondary Outcomes

**eTable 3.** Results From Fixed Effects and Random Effects Models for Risk Difference and Relative Risk for All Outcomes Reported in the GRADE Assessment of Quality of Evidence

This supplementary material has been provided by the authors to give readers additional information about their work.

**eFigure 1. Flow Diagram**

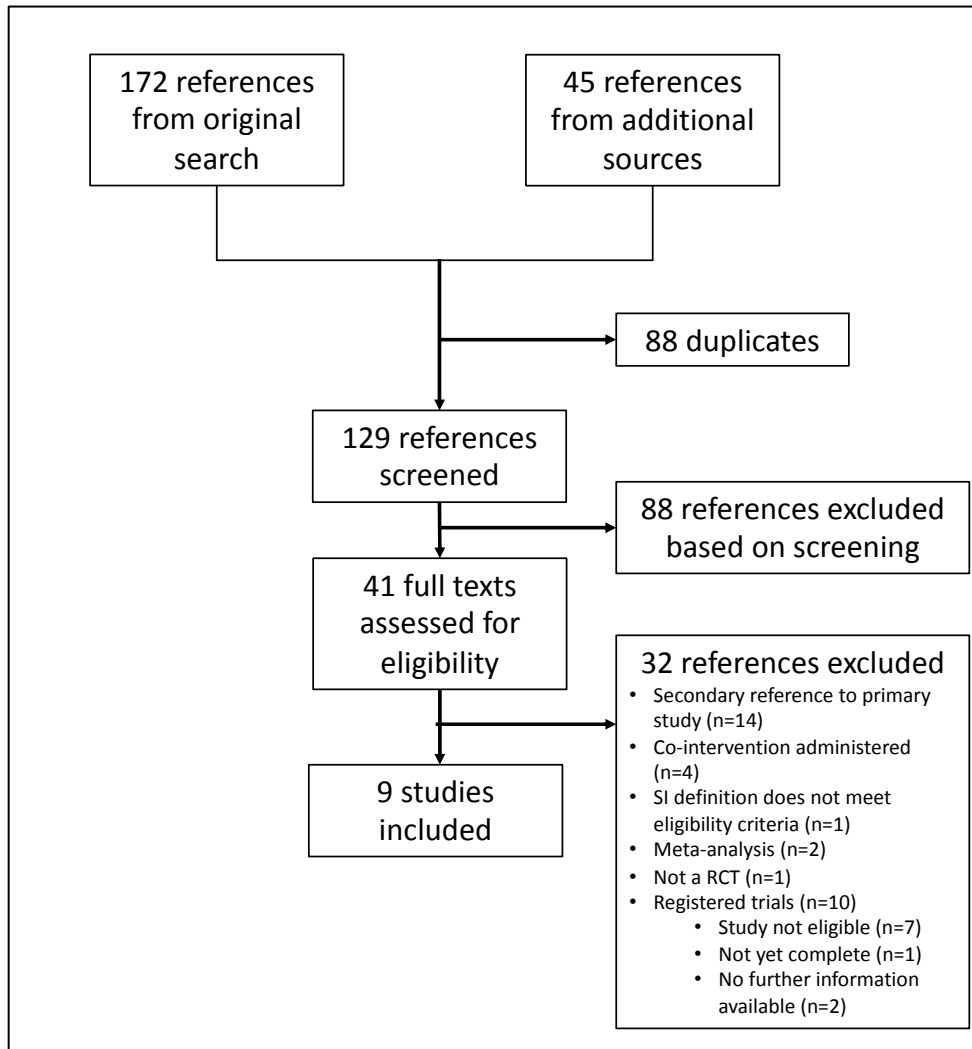

**eFigure 2.** Fixed Effects Meta-Analysis of Relative Risk for Death During Hospitalization

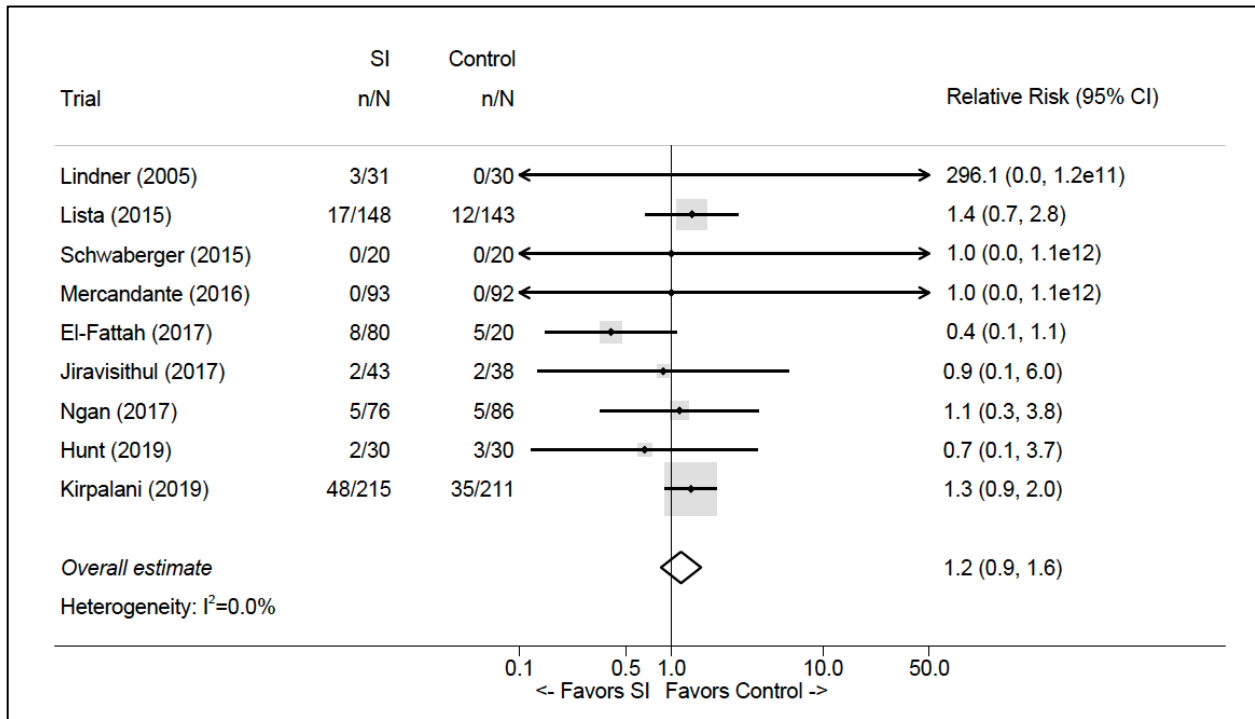

Study weights are indicated via the gray boxes.

The Sweeting correction was applied to relative risk estimates for studies with zero events in any arm.

**eFigure 3. Fixed Effects Meta-Analysis of Death During Hospitalization by Post Hoc Gestational Age Subgroups**

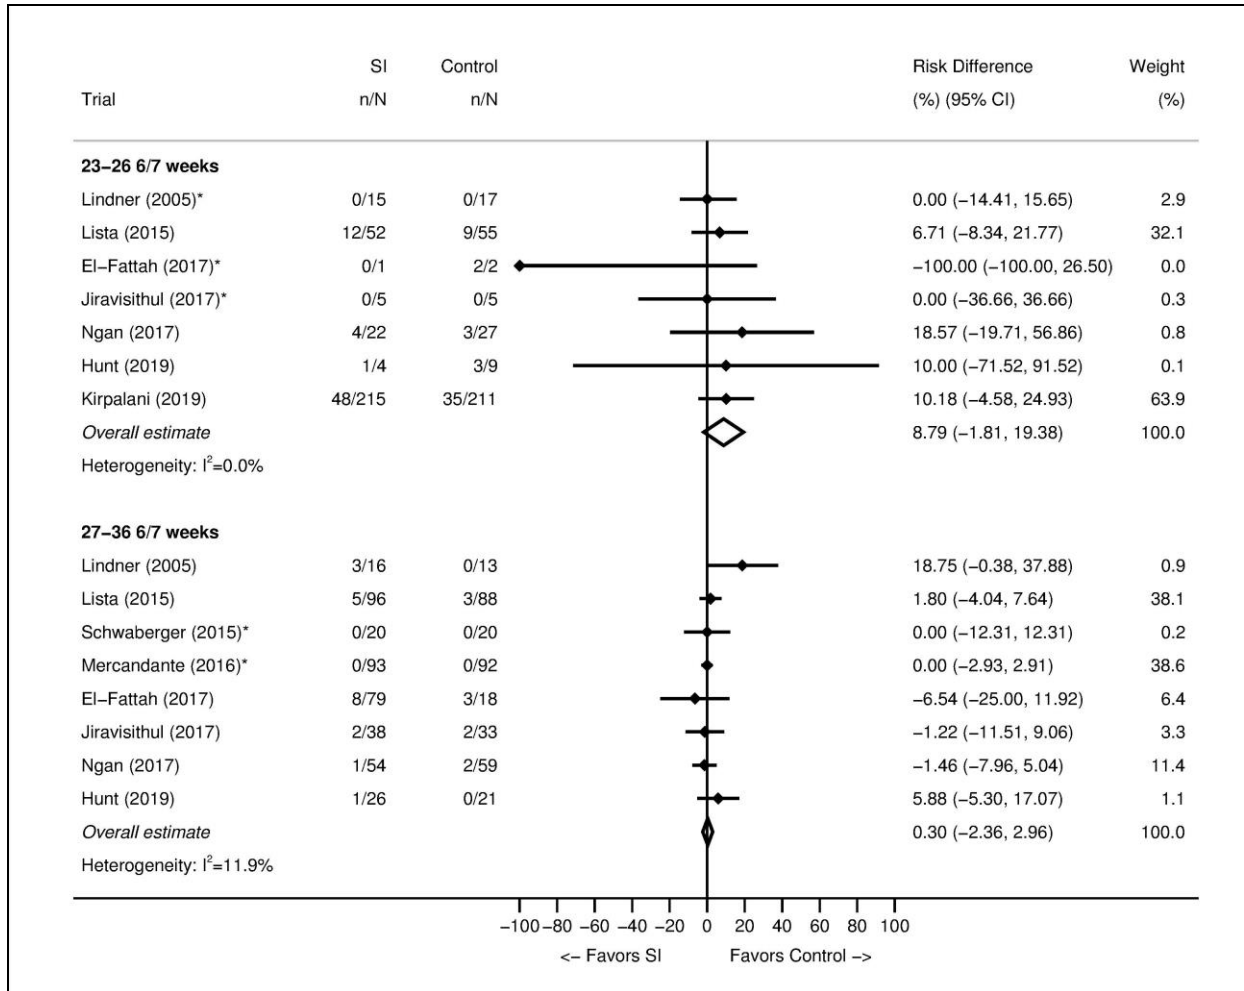

\*Exact confidence intervals shown

**eFigure 4.** Fixed Effects Meta-Analysis for Death in the First 2 Days by Gestational Age Subgroups

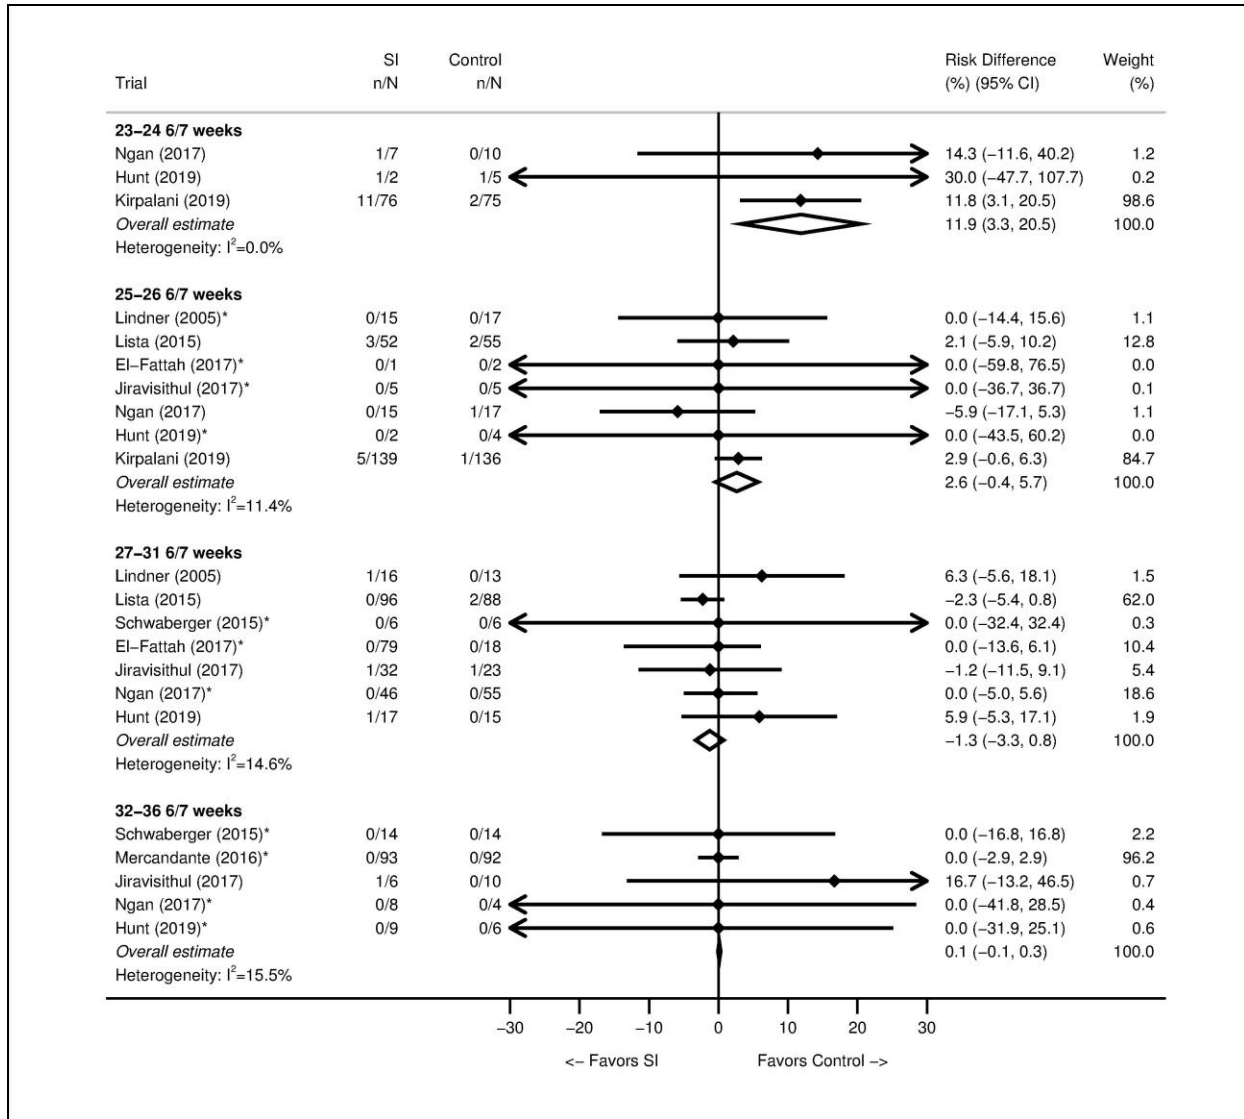

\*Exact confidence intervals shown

**eFigure 5.** Fixed Effects Cumulative Meta-Analysis for Death in the First 2 Days

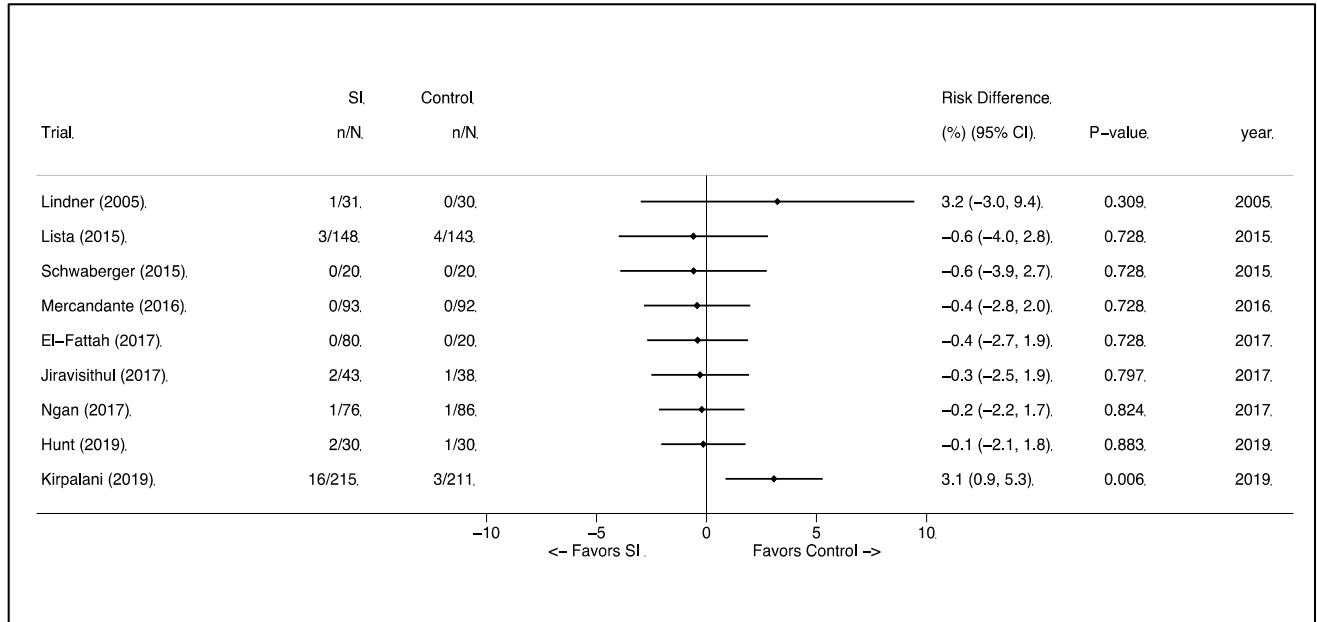

**eFigure 6. Fixed Effects Meta-Analysis for Death in the Delivery Room by Gestational Age Subgroups**

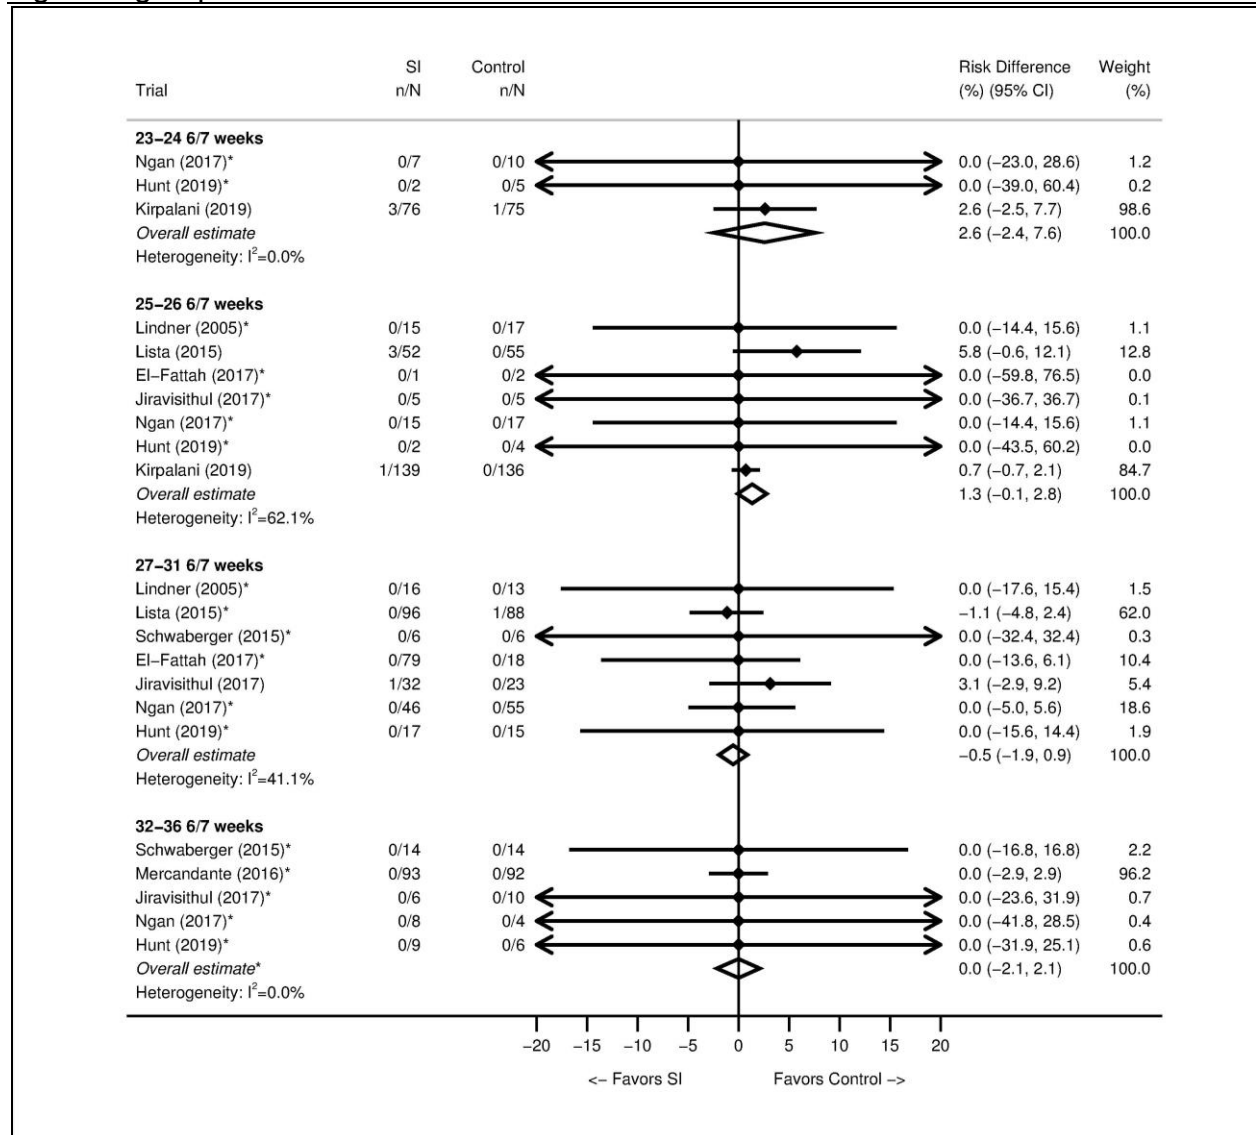

\*Exact confidence intervals shown

**eFigure 7. Subgroup Analysis of All Secondary Outcomes Based on Study Design Subgroups**

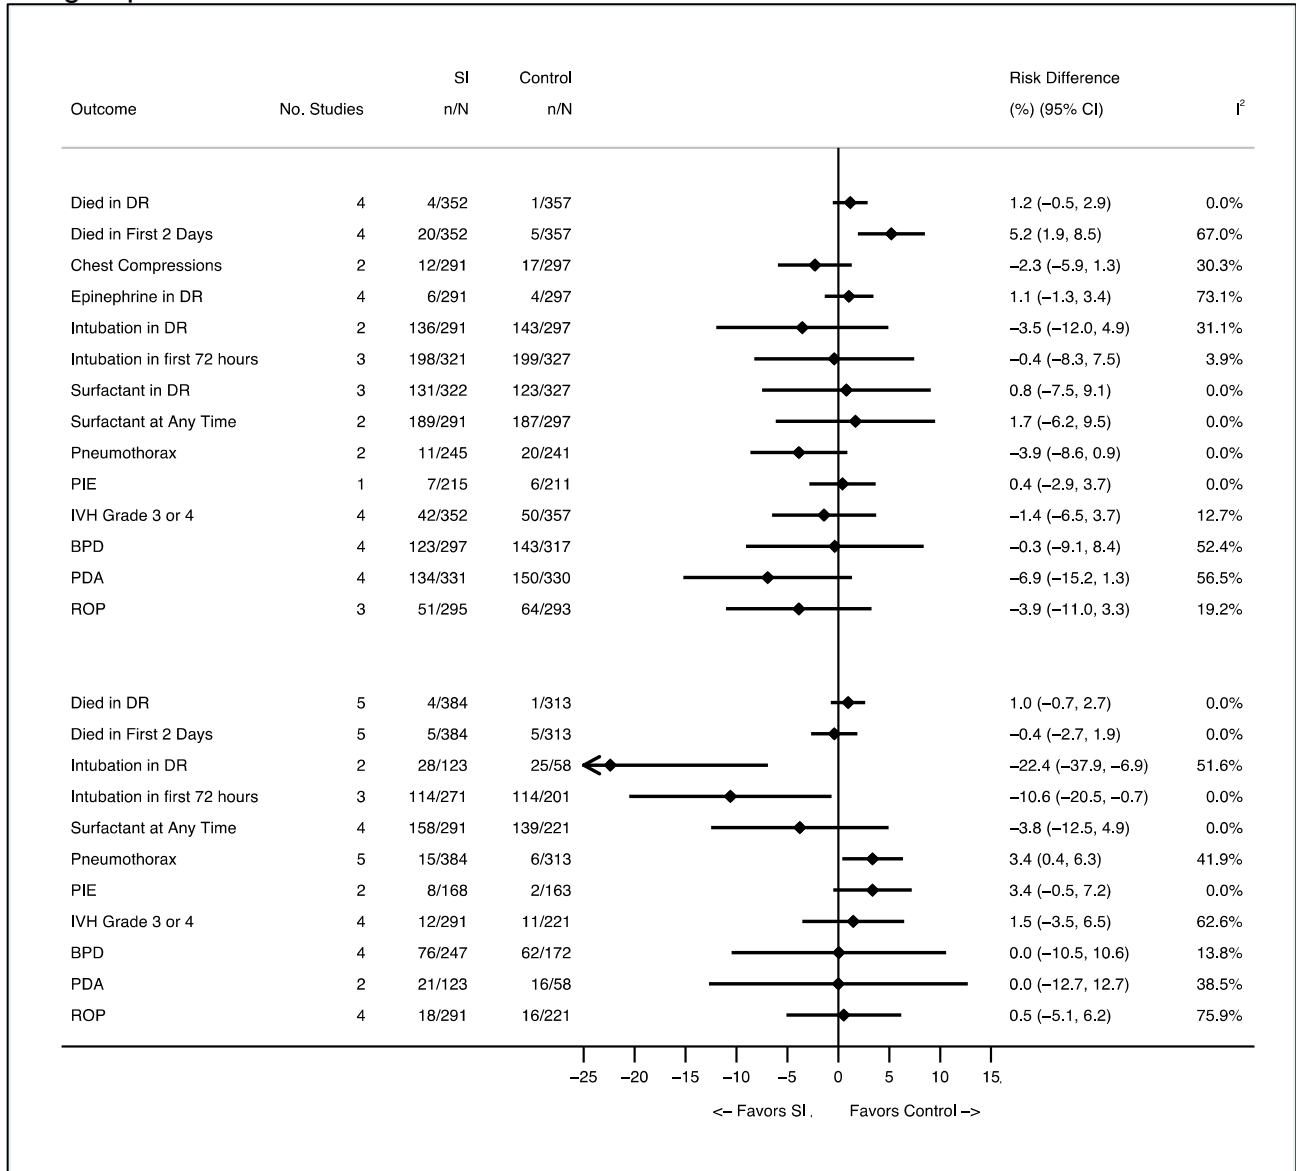

Chest compression and epinephrine data not reported for prophylactic studies.

Abbreviations: BPD: bronchopulmonary dysplasia, DR: delivery room, IVH: intraventricular hemorrhage, PDA: patent ductus arteriosus, PDA: patent ductus arteriosus, PIE: pulmonary interstitial emphysema, ROP: retinopathy of prematurity.



**eTable 1.** Assessment of Risk of Bias for Included Trials

| Study              | Sequence generation | Allocation concealment | Blinding of caregivers | Incomplete outcome data | Selective reporting | Other risk of bias                                                                                                        |
|--------------------|---------------------|------------------------|------------------------|-------------------------|---------------------|---------------------------------------------------------------------------------------------------------------------------|
| Lindner 2005       | Unclear risk        | Low risk               | High risk              | Low risk                | Low risk            | Unclear: Study closed early for poor recruitment after first interim analysis                                             |
| Lista 2015         | Unclear risk        | Low risk               | High risk              | Low risk                | Low risk            | N/A                                                                                                                       |
| Jiravisitkul 2017  | Low risk            | Low risk               | High risk              | Unclear risk            | Low risk            | Unclear: Control group (n=38) did not reach targeted sample size (n=40), although study reached overall enrollment target |
| Schwabegger 2015   | Low risk            | Low risk               | High risk              | Low risk                | Low risk            | N/A                                                                                                                       |
| Mercadante 2016    | Unclear risk        | Low risk               | High risk              | Low risk                | Low risk            | N/A                                                                                                                       |
| Abd El-Fattah 2017 | Low risk            | Low risk               | High risk              | Low risk                | Low risk            | N/A                                                                                                                       |
| Ngan 2017          | Low risk            | High risk              | High risk              | High risk               | Low risk            | Unclear: Sample size calculated for event rate that far exceeded observed event rate in control group                     |
| Hunt 2019          | Low risk            | High risk              | High risk              | Low risk                | Low risk            | N/A                                                                                                                       |
| Kirpalani 2019     | Low risk            | Low risk               | High risk              | Low risk                | Low risk            | Unclear: Trial closed early for increased death in first 48 hours in SI group                                             |

Abbreviations: N/A: not applicable, SI: sustained inflation

**eTable 2. GRADE Quality of Evidence Assessment for Primary and Prespecified Secondary Outcomes**

| Outcome                      | Quality Assessment |              |                           |                            |              |                          | No of patients  |                 | Effect                   |                                           | Quality | Importance <sup>4</sup> |
|------------------------------|--------------------|--------------|---------------------------|----------------------------|--------------|--------------------------|-----------------|-----------------|--------------------------|-------------------------------------------|---------|-------------------------|
|                              | No of Studies      | Study Design | Risk of Bias <sup>1</sup> | Inconsistency <sup>2</sup> | Indirectness | Imprecision <sup>3</sup> | SI              | Control         | Relative                 | Absolute                                  |         |                         |
| Death during hospitalization | 9                  | RCTs         | Serious                   | Not Serious                | Not serious  | Serious                  | 85/736 (11.5%)  | 62/670 (9.3%)   | 1.16 (from 0.86 to 1.57) | 4 more per 100 (from 1 fewer to 8 more)   | Low     | Critical                |
| Chest compressions in the DR | 2                  | RCTs         | Serious                   | Not serious                | Not serious  | Serious                  | 12/291 (4.1%)   | 17/297 (5.7%)   | 0.73 (from 0.35 to 1.49) | 2 fewer per 100 (from 6 fewer to 1 more)  | Low     | Important               |
| Epinephrine in the DR        | 2                  | RCTs         | Serious                   | Not serious                | Not serious  | Serious                  | 6/291 (2.1%)    | 4/297 (1.3%)    | 1.50 (from 0.42 to 5.31) | 1 more per 100 (from 1 fewer to 3 more)   | Low     | Important               |
| Intubation in first 72 hours | 6                  | RCTs         | Serious                   | Serious                    | Not serious  | Serious                  | 312/592 (52.7%) | 313/528 (59.2%) | 0.94 (from 0.85 to 1.03) | 4 fewer per 100 (from 10 fewer to 3 more) | Low     | Important               |
| Pneumothorax                 | 7                  | RCTs         | Serious                   | Not serious                | Not serious  | Serious                  | 26/629 (4.1%)   | 26/554 (4.7%)   | 0.89 (from 0.53 to 1.50) | 1 fewer per 100 (from 4 fewer to 2 more)  | Low     | Important               |
| Grade 3 or 4 IVH             | 8                  | RCTs         | Serious                   | Not serious                | Not serious  | Serious                  | 54/643 (8.4%)   | 61/578 (10.6%)  | 0.90 (from 0.65 to 1.26) | 1 fewer per 100 (from 4 fewer to 3 more)  | Low     | Critical                |
| BPD                          | 8                  | RCTs         | Serious                   | Not serious                | Not serious  | Serious                  | 199/544 (36.6%) | 205/489 (41.9%) | 0.92 (from 0.80 to 1.07) | 0 per 100 (from 7 fewer to 7 more)        | Low     | Critical                |

<sup>1</sup>Blinding of intervention not possible

<sup>2</sup>Inconsistency evaluated based on measures of relative (not absolute) treatment effects. I<sup>2</sup> values <40% for all outcomes

<sup>3</sup>All studies include <2,000 participants

<sup>4</sup>Importance consistent with rating by International Liaison Committee on Resuscitation where possible

Abbreviations: BPD: bronchopulmonary dysplasia, DR: delivery room, IVH: intraventricular hemorrhage, RCTs: randomized controlled trials

**eTable 3.** Results From Fixed Effects and Random Effects Models for Risk Difference and Relative Risk for All Outcomes Reported in the GRADE Assessment of Quality of Evidence

| Outcome                      | # studies | Fixed Effects RD (%) (95% CI) | I <sup>2</sup> | Random Effects RD (%) (95% CI) | I <sup>2</sup> | Fixed Effects RR (95% CI) | I <sup>2</sup> | Random Effects RR (95% CI) | I <sup>2</sup> |
|------------------------------|-----------|-------------------------------|----------------|--------------------------------|----------------|---------------------------|----------------|----------------------------|----------------|
| Death in hospital            | 9         | 3.6<br>(-0.7, 7.9)            | 16.5           | 1.0<br>(-1.5, 2.7)             | 0.0            | 1.2 (0.9,1.6)             | 0.0            | 1.2 (0.8, 1.7)             | 0.0            |
| Chest compressions in DR     | 2         | -2.3<br>(-5.9, 1.3)           | 30.3           | -1.4<br>(-29.7, 26.9)          | 25.3           | 0.7<br>(0.4, 1.5)         | 34.5           | 0.8<br>(0.0, 345.5)        | 34.4           |
| Epinephrine in DR            | 2         | 1.1<br>(-1.3, 3.4)            | 73.1           | 0.0<br>(-16.0, 16.0)           | 48.9           | 1.5<br>(0.4, 5.3)         | 0.0            | 1.9<br>(0.0, 1.4e+04)      | 0.0            |
| Intubation in first 72 hours | 6         | -3.6<br>(-9.8, 2.6)           | 0.0            | -3.8<br>(-11.0, 3.4)           | 0.0            | 0.9<br>(0.8, 1.0)         | 0.0            | 0.9<br>(0.8, 1.1)          | 0.0            |
| Pneumothorax                 | 7         | -0.8<br>(-3.9, 2.2)           | 60.1           | -0.4<br>(-4.5, 3.8)            | 53.7           | 0.9 (0.5, 1.5)            | 24.2           | 0.8 (0.3, 2.6)             | 20.1           |
| IVH Grade 3/4                | 8         | -0.5<br>(-4.3, 3.3)           | 6.1            | 0.0 (-1.2,1.1)                 | 0.0            | 0.9 (0.6, 1.3)            | 0.0            | 0.9 (0.6, 1.4 )            | 0.0            |
| BPD                          | 8         | -0.2<br>(-7.2, 6.8)           | 27.6           | -4.1 (-10.2,2.0)               | 4.7            | 0.9 (0.8, 1.1)            | 13.5           | 0.9 (0.8, 1.1)             | 11.0           |

Abbreviations: BPD: bronchopulmonary dysplasia, CI: confidence interval, CPR: cardiopulmonary resuscitation, DR: delivery room, IVH: intraventricular hemorrhage, RCTs: randomized controlled trials, RD: risk difference, RR: relative risk
